# Supplementary material
Source: PubMed Central journal article supplement (PMC4972257)
Supplement: supp_pp.15.01207_PP2015-01207R1_Supplemental_Table_S1_S3_S4.pdf [file supp_pp.15.01207_PP2015-01207R1_Supplemental_Table_S1_S3_S4.pdf]

1  
2  
3  
4  
5  
6  
7  
8  
9  
10  
11  
12  
13  
14

**Supplemental Table S1.** Summary of *Arabidopsis thaliana* and *A. lyrata* array design features

| <b>Array features</b>             | <b><i>A. thaliana</i></b> | <b><i>A. lyrata ssp. lyrata</i></b> |
|-----------------------------------|---------------------------|-------------------------------------|
| Agilent design Id                 | 029132                    | 030951                              |
| Design format                     | 8X60K                     | 8X60K                               |
| Number of biological probes       | 43603                     | 32386                               |
| Number of replicated probes       | 50 X 5                    | 477 X 10                            |
| Mean probe length (bp)            | 60                        | 60                                  |
| Agilent controls on array         | 1319                      | 1319                                |
| % filled by selected probe group  | 71.64                     | 61.09                               |
| Total number of features on array | 62976                     | 62976                               |
| Total % filled                    | 100                       | 100                                 |

15 **Supplemental Table S3.** *A. thaliana* mutants used in this study for genetic complementation with *A. lyrata* homologs. The complemented plants  
 16 were phenotyped according to the conditions described in the original reference.

17

| Gene      | Annotation                      | Mutant name                       | Nature of mutation                                                                                     | Phenotype                                                                                                                                                                                                                            | Genetic background      | Reference                                            | Utility in our complementation assay |
|-----------|---------------------------------|-----------------------------------|--------------------------------------------------------------------------------------------------------|--------------------------------------------------------------------------------------------------------------------------------------------------------------------------------------------------------------------------------------|-------------------------|------------------------------------------------------|--------------------------------------|
| AT2G21790 | Ribonucleotide reductase 1/RNR1 | <i>crinkled leaves 8 (cls8-1)</i> | Point mutation. Missense G>A substitution/ G718>E.                                                     | First developing true leaves emerge bleached, subsequent leaves emerge curled with bleached edges, matured rosette leaves become crinkled and show patches of white pits on the surface                                              | Columbia                | Garton et al. (2007) Plant Journal 50: 118–127       | Used in complementation assay.       |
| AT3G27060 | Ribonucleotide reductase 2/TSO2 | <i>tso2-1</i>                     | Point mutation. Missense change: D49>N.                                                                | White sectors in green organs, uneven thickness, rough surfaces, irregular margins of leaves or floral organs, sepals rough and uneven, stamens occasionally exhibited carpel characteristics indicating homeotic transformation.    | Landsberg <i>erecta</i> | Wang and Liu (2006) Plant Cell 18: 350-365           | Used in complementation assay.       |
| AT2G39450 | Manganese transporter 11/MTP11  | <i>N859636, SALK_025271</i>       | T-DNA insertion                                                                                        | On nutrient agar supplied with Mn <sup>2+</sup> concentrations ranged from basal to toxic levels, the mutant was more sensitive to Mn <sup>2+</sup> than the wild type, as determined by significantly reduced shoot dry weights.    | Columbia                | Delhaize et al. (2007) The Plant Journal 51: 198–210 | Used in complementation assay.       |
| AT4G03430 | Stabilized 1/STA1               | <i>sta1-1</i>                     | In-frame deletion of two amino acids: 1249 to 1254 bp from the translation initiation site/ 417C, 418P | <i>sta1-1</i> plants showed many developmental and stress-related phenotypes, smaller in size and heights than the wild-type plants. Mutant leaves were more serrated with a pointed leaf tip. The mutant was more sensitive to ABA. | Columbia g11            | Lee et al. (2006) Plant Cell 18: 1736–1749           | Used in complementation assay.       |

18 **Supplemental Table S4.** Oligonucleotides used in this study for different purposes.

19 \*Since, the promoter and 3' UTR region of *AL.MTP11A* and *B* are sequentially highly similar, we used the same oligonucleotide pairs

20 to amplify both homologs.

| Target gene | Gene identifier                   | Oligo name     | 5'-3' sequence                                      | Amplified product length | Purpose                             |
|-------------|-----------------------------------|----------------|-----------------------------------------------------|--------------------------|-------------------------------------|
| AL.RNR1A    | Al_scaffold_0007_128              | AL.CLSA.GW.F   | GGGGACAAGTTTGTACAAAAAAGCAGGCTaaagacgacaaaacaaacg    | 6.3 Kb                   | Gene amplification- GATEWAY cloning |
| AL.RNR1A    | Al_scaffold_0007_128              | AL.CLSA.GW.R   | GGGGACCACTTTGTACAAGAAAGCTGGGtctgagatttgaggatgagg    | -                        | Gene amplification- GATEWAY cloning |
| AL.RNR1B    | fgenes2_kg.4_104_AT2G2179<br>0.1  | AL.CLSB.GW.F   | GGGGACAAGTTTGTACAAAAAAGCAGGCTaaagagtgctggaagtcta    | 6.5 Kb                   | Gene amplification- GATEWAY cloning |
| AL.RNR1B    | fgenes2_kg.4_104_AT2G2179<br>0.1  | AL.CLSB.GW.R   | GGGGACCACTTTGTACAAGAAAGCTGGGTaagtccacaaaatcctctct   | -                        | Gene amplification- GATEWAY cloning |
| AL.TSO2A    | fgenes2_kg.5_483_AT3G2706<br>0.1  | AL.TSO2A.GW.F  | GGGGACAAGTTTGTACAAAAAAGCAGGCTgttcacaaacatggcttagg   | 3.73 Kb                  | Gene amplification- GATEWAY cloning |
| AL.TSO2A    | fgenes2_kg.5_483_AT3G2706<br>0.1  | AL.TSO2A.GW.R  | GGGGACCACTTTGTACAAGAAAGCTGGGtccaatctataaaacacaaaaca | -                        | Gene amplification- GATEWAY cloning |
| AL.TSO2B    | scaffold_703867.1                 | AL.TSO2B.GW.F  | GGGGACAAGTTTGTACAAAAAAGCAGGCTcatctgaatcatgtctctt    | 3.58 Kb                  | Gene amplification- GATEWAY cloning |
| AL.TSO2B    | scaffold_703867.1                 | AL.TSO2B.GW.R  | GGGGACCACTTTGTACAAGAAAGCTGGGTaactggccatatacaactta   | -                        | Gene amplification- GATEWAY cloning |
| AL.STA1A    | fgenes2_kg.6_3353_AT4G034<br>30.1 | AL.STA1A.GW.F2 | GGGGACAAGTTTGTACAAAAAAGCAGGCTggcttggtaataacgtcca    | 5.78 Kb                  | Gene amplification- GATEWAY cloning |
| AL.STA1A    | fgenes2_kg.6_3353_AT4G034<br>30.1 | AL.STA1A.GW.R2 | GGGGACCACTTTGTACAAGAAAGCTGGGTcaacatacccgtgttct      | -                        | Gene amplification- GATEWAY cloning |
| AL.STA1B    | scaffold_700051.1                 | AL.STA1B.GW.F  | GGGGACAAGTTTGTACAAAAAAGCAGGCTagaattggggacttaaca     | 5.8 Kb                   | Gene amplification- GATEWAY cloning |
| AL.STA1B    | scaffold_700051.1                 | AL.STA1B.GW.R  | GGGGACCACTTTGTACAAGAAAGCTGGGTaaactcaagttcgatccgta   | -                        | Gene amplification- GATEWAY cloning |
| AL.MTP11*   | -                                 | AL.MTP11GW.F   | GGGGACAAGTTTGTACAAAAAAGCAGGCTgatggagtggaacagaaga    | 4.9 Kb                   | Gene amplification- GATEWAY cloning |

|                       |                                     |                 |                                                   |        |                                              |
|-----------------------|-------------------------------------|-----------------|---------------------------------------------------|--------|----------------------------------------------|
| AL.MTP11*             | -                                   | AL.MTP11GW.R    | GGGGACCACTTTGTACAAGAAAGCTGGGTggtgagaatcagagtgagga | -      | Gene amplification- GATEWAY cloning          |
| AL.MTP11A             | fgenes2_kg.4_2026_AT2G394<br>50.1   | AL.MTP11A.RT.F1 | GGTCCGGAAGACAATGTG                                | 199 bp | RT-qPCR- gene expression assay               |
| AL.MTP11A             | fgenes2_kg.4_2026_AT2G394<br>50.1   | AL.MTP11A.RT.R  | AGACTTTAGCAGCAAAAAGAAG                            |        | RT-qPCR- gene expression assay               |
| AL.MTP11B             | fgenes2_kg.463_5_AT2G3945<br>0.1    | AL.MTP11B.RT.F1 | GGTCCGGAAGACAATGTA                                | 199 bp | RT-qPCR- gene expression assay               |
| AL.MTP11B             | fgenes2_kg.463_5_AT2G3945<br>0.1    | AL.MTP11B.RT.R  | AGACTTTAGCAGCAAAAAGAAC                            |        | RT-qPCR- gene expression assay               |
| AL.UBQ5               | fgenes2_kg.5_2722_AT3G622<br>50.1.1 | AL.UBQ5_fnew    | GATGGATCTGGAAAAGTTCAG                             | 168 bp | RT-qPCR -reference gene for <i>A. lyrata</i> |
| AL.UBQ5               | fgenes2_kg.5_2722_AT3G622<br>50.1.1 | AL.UBQ5_rnew    | AGCGGTTGCTAGAACAGATC                              | -      | RT-qPCR reference gene for <i>A. lyrata</i>  |
| AL.S16                | fgenes2_kg.6_1842_AT2G099<br>90.1.1 | AL.S16qRT_f     | TTTACGCCATCCGGCAGAGTAT                            | 186 bp | RT-qPCR reference gene for <i>A. lyrata</i>  |
| AL.S16                | fgenes2_kg.6_1842_AT2G099<br>90.1.1 | AL.S16qRT_r     | GGAAACGAGCACGAGCAC                                | -      | RT-qPCR reference gene for <i>A. lyrata</i>  |
| At.mtp11<br>TDNA line | -                                   | SALK_025271.LP  | AATCTGCAATCCAAGTGTTC                              |        | Genotyping                                   |
| At.mtp11<br>TDNA line | -                                   | SALK_025271.RP  | CTGCTCGAGTTTCACGGTAAC                             |        | Genotyping                                   |
| AL.RNR1A              | A1_scaffold_0007_128                | AL_CLSA_F       | ATGGTCTATCGTGAATGTCAAG                            | 650 bp | PCR assay to confirm transgene insertion     |
| AL.RNR1A              | A1_scaffold_0007_128                | AL_CLSA_R       | TTGTCTCGTTGTCTTCTCTGTTG                           | -      | PCR assay to confirm transgene insertion     |
| AL.STA1B              | scaffold_700051.1                   | AL_STA1-B_F     | AGTTAGAGAAGAGTCATGGTAGTAT                         | 300 bp | PCR assay to confirm transgene insertion     |
| AL.STA1B              | scaffold_700051.1                   | AL_STA1-B_R     | TTCATCCACACCCCTCCAGTAGT                           | -      | PCR assay to confirm transgene insertion     |

21

22
